# Supplementary material for: Effects of the COVID-19 Pandemic on Brief Resolved Unexplained Events (BRUEs) in Children: A Comparative Analysis of Pre-Pandemic and Pandemic Periods
Source: MDPI journal article supplement (doi:10.3390/life14030392), 2024-03-15
Supplement: s1 [file s1]

## Supplementary Materials

**Table S1.** Comparative overview of continuous variables between the pre-COVID-19 period and the onset of the SARS-CoV-2 pandemic. The table displays each variable's mean and standard deviation (S.D.), including the total number of patients, birth weight, age at the BRUE event, and the duration of home monitoring. Additionally, it provides the asymptotic significance value for a two-way test.

| Continuous Variable                | Mean $\pm$ S.D.   | Mean S.E. | Mean $\pm$ S.D.  | Mean S.E. | Sign. Asymptotic |
|------------------------------------|-------------------|-----------|------------------|-----------|------------------|
|                                    | pre-COVID-19      |           | Start-SARS-COV-2 |           |                  |
| Total number of patients (% males) | 186 (51.6)        |           | 268 (42.5)       | -         | 0.056            |
| Birth weight (grams)               | 3,094 $\pm$ 609   | 44.6      | 3,072 $\pm$ 643  | 39.3      | 0.588            |
| Age (days) at the event BRUE       | 101.3 $\pm$ 100.6 | 7.4       | 98.5 $\pm$ 84.3  | 5.2       | 0.764            |
| Duration of home monitoring (days) | 123.6 $\pm$ 148.0 | 10.9      | 105.9 $\pm$ 99.6 | 6.1       | 0.128            |

Legend: BRUE, Brief Resolved Unexplained Event; S.D., standard deviation; S.E., standard error.
